# Supplementary material
Source: PubMed Central journal article supplement (PMC1165396)

**F-actin****Dynamamin****Merge****Wild Type**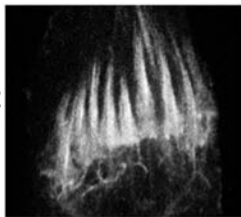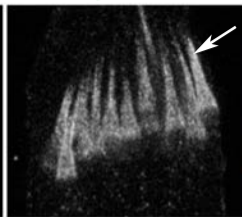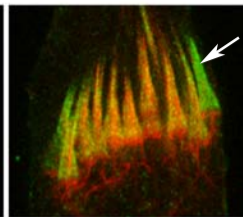***ddlc1 ins1***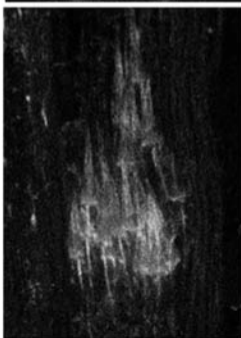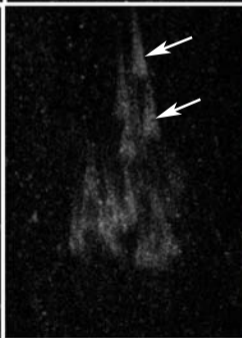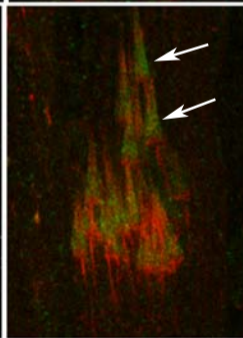

Supplement: mbc_E05-02-0103_1.pdf [file mbc_E05-02-0103_1.pdf]
